# Supplementary material for: A self-powered flexible UV photodetector based on an individual ZnO-amorphous Ga2O3 core–shell heterojunction microwire
Source: Royal Society of Chemistry journal article supplement (doi:10.1039/d4tc01327a), 2024-01-01
Supplement: d4tc01327a1.pdf [file d4tc01327a1.pdf]

## Electronic Supplementary Information

### Self-powered flexible UV photodetector based on individual ZnO-amorphous Ga<sub>2</sub>O<sub>3</sub> core-shell heterojunction microwire

Received 00th January 20xx,  
Accepted 00th January 20xx

DOI: 10.1039/x0xx00000x

Yinzhe Liu,<sup>ab</sup> Kewei Liu,<sup>\*ab</sup> Jialin Yang,<sup>ab</sup> Zhen Cheng,<sup>ab</sup> Xing Chen,<sup>ab</sup> Yongxue Zhu,<sup>ab</sup> Binghui Li,<sup>ab</sup> Lei Liu,<sup>ab</sup> and Dezhen Shen<sup>\*ab</sup>

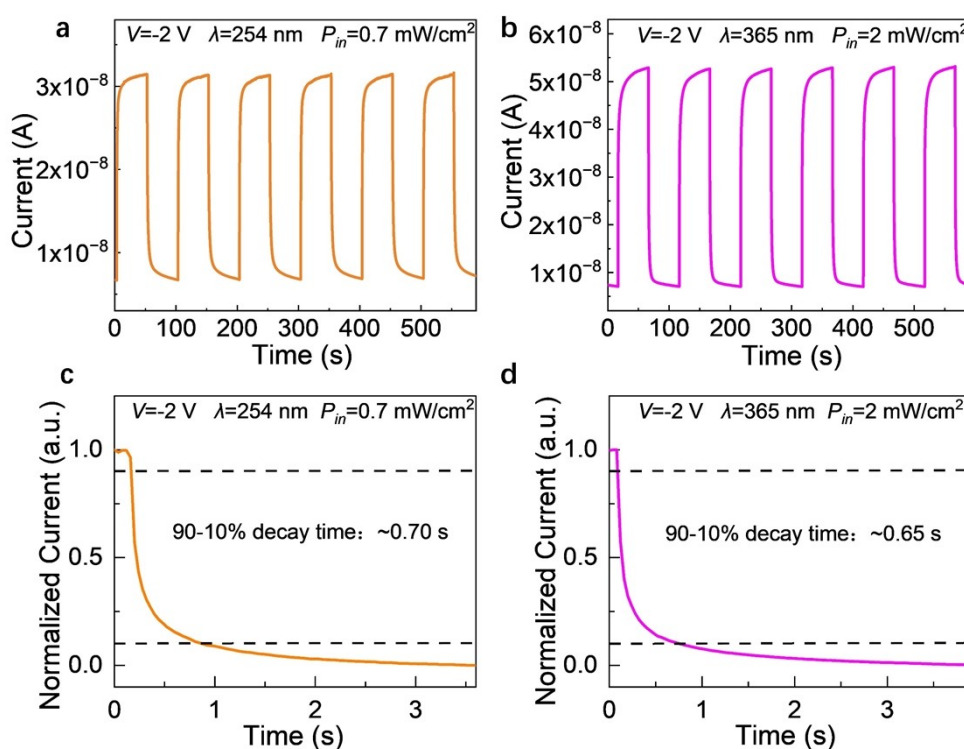

**Figure S1:** The  $I$ - $t$  curves of ZnO-a-Ga<sub>2</sub>O<sub>3</sub> core-shell microwire under (a) 254 nm and (b) 365 nm light illumination at -2 V. The normalized decay edges under (c) 254 nm light illumination and (d) 365 nm light illumination at -2 V.

<sup>a</sup> State Key Laboratory of Luminescence and Applications, Changchun Institute of Optics, Fine Mechanics and Physics, Chinese Academy of Sciences, No. 3888 Dongnanhu Road, Changchun, 130033, People's Republic of China. E-mail: [liukw@ciomp.ac.cn](mailto:liukw@ciomp.ac.cn), [shenzd@ciomp.ac.cn](mailto:shenzd@ciomp.ac.cn)

<sup>b</sup> Center of Materials Science and Optoelectronics Engineering, University of the Chinese Academy of Sciences, Beijing 100049, People's Republic of China

†Electronic Supplementary Information (ESI) available: See DOI: 10.1039/x0xx00000x

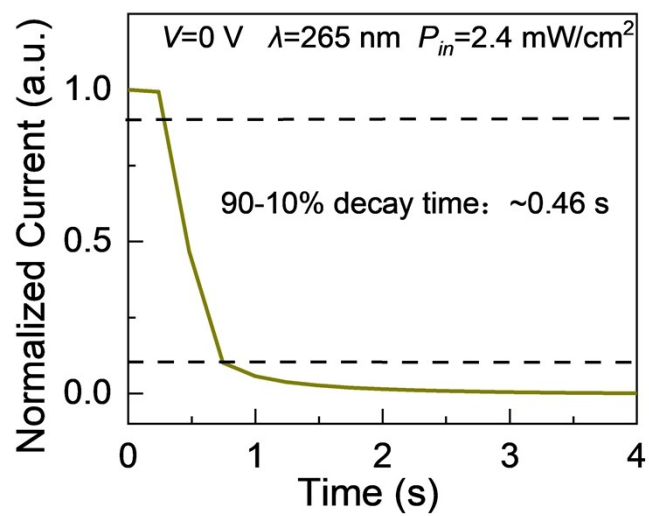

**Figure S2:** The normalized decay edge under 265 nm light illumination at 0 V.
